# Supplementary material for: Superpixel-Based Conditional Random Fields (SuperCRF): Incorporating Global and Local Context for Enhanced Deep Learning in Melanoma Histopathology
Source: Front Oncol. 2019 Oct 11;9:1045. doi: 10.3389/fonc.2019.01045 (PMC6798642; doi:10.3389/fonc.2019.01045)
Supplement: Supplementary file 9 [file Table_9.DOCX]

**Supplementary Table 9** – Confusion matrix of the classified cells from SuperCRF architecture, where the trained conditional random field (CRF) combines the classified cells from the spatially constrained-convolution neural network (SC-CNN), with the region classification information from the 1.25x and 5x magnification whole-slide images and local context information (neighboring classified cells). C: cancer cells, E: epidermis cells, L: lymphocytes, S: Stromal cells.

|  | | **SuperCRF** | | | |
| --- | --- | --- | --- | --- | --- |
| **C** | **E** | **L** | **S** |
| **Classes**  **(Cells)** | **Cancer** | 1482 | 24 | 2 | 20 |
| **Epidermis** | 17 | 795 | 1 | 8 |
| **Lymphocytes** | 24 | 1 | 660 | 12 |
| **Stromal** | 4 | 17 | 13 | 979 |
